# Supplementary material for: Boron and pyridinic nitrogen-doped graphene as potential catalysts for rechargeable non-aqueous sodium–air batteries
Source: Royal Society of Chemistry journal article supplement (doi:10.1039/d0ra03126g), 2020-01-01
Supplement: d0ra03126g1.pdf [file d0ra03126g1.pdf]

## Supplementary information

### Boron and Pyridinic Nitrogen Doped Graphene as Potential Catalysts in Rechargeable Non-Aqueous Sodium-Air Battery

Natei Ermias Benti<sup>1</sup>, Girum Ayalneh Tiruye<sup>2</sup>, Yedilfana Setarge Mekonnen<sup>1,\*</sup>

<sup>1</sup>Center for Environmental Science, College of Natural and Computational Sciences, Addis Ababa University, P. O. Box 1176, Addis Ababa, Ethiopia

<sup>2</sup>Materials Science Program/Department of Chemistry, College of Natural and Computational Sciences, Addis Ababa University, P. O. Box 33658, Addis Ababa, Ethiopia

\*Corresponding author email: [yedilfana.setarge@aau.edu.et](mailto:yedilfana.setarge@aau.edu.et)

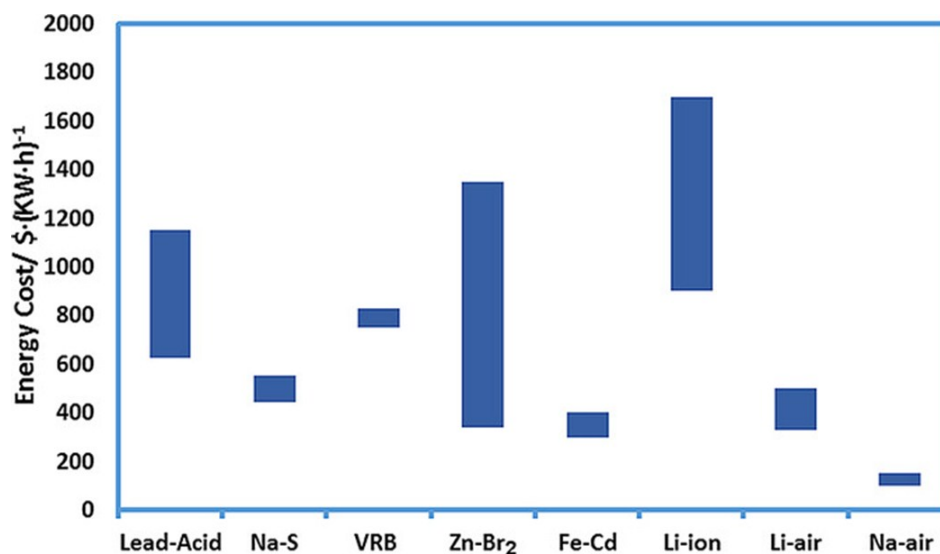

Figure S1: The energy cost of various batteries based on the current price of materials.<sup>1</sup>

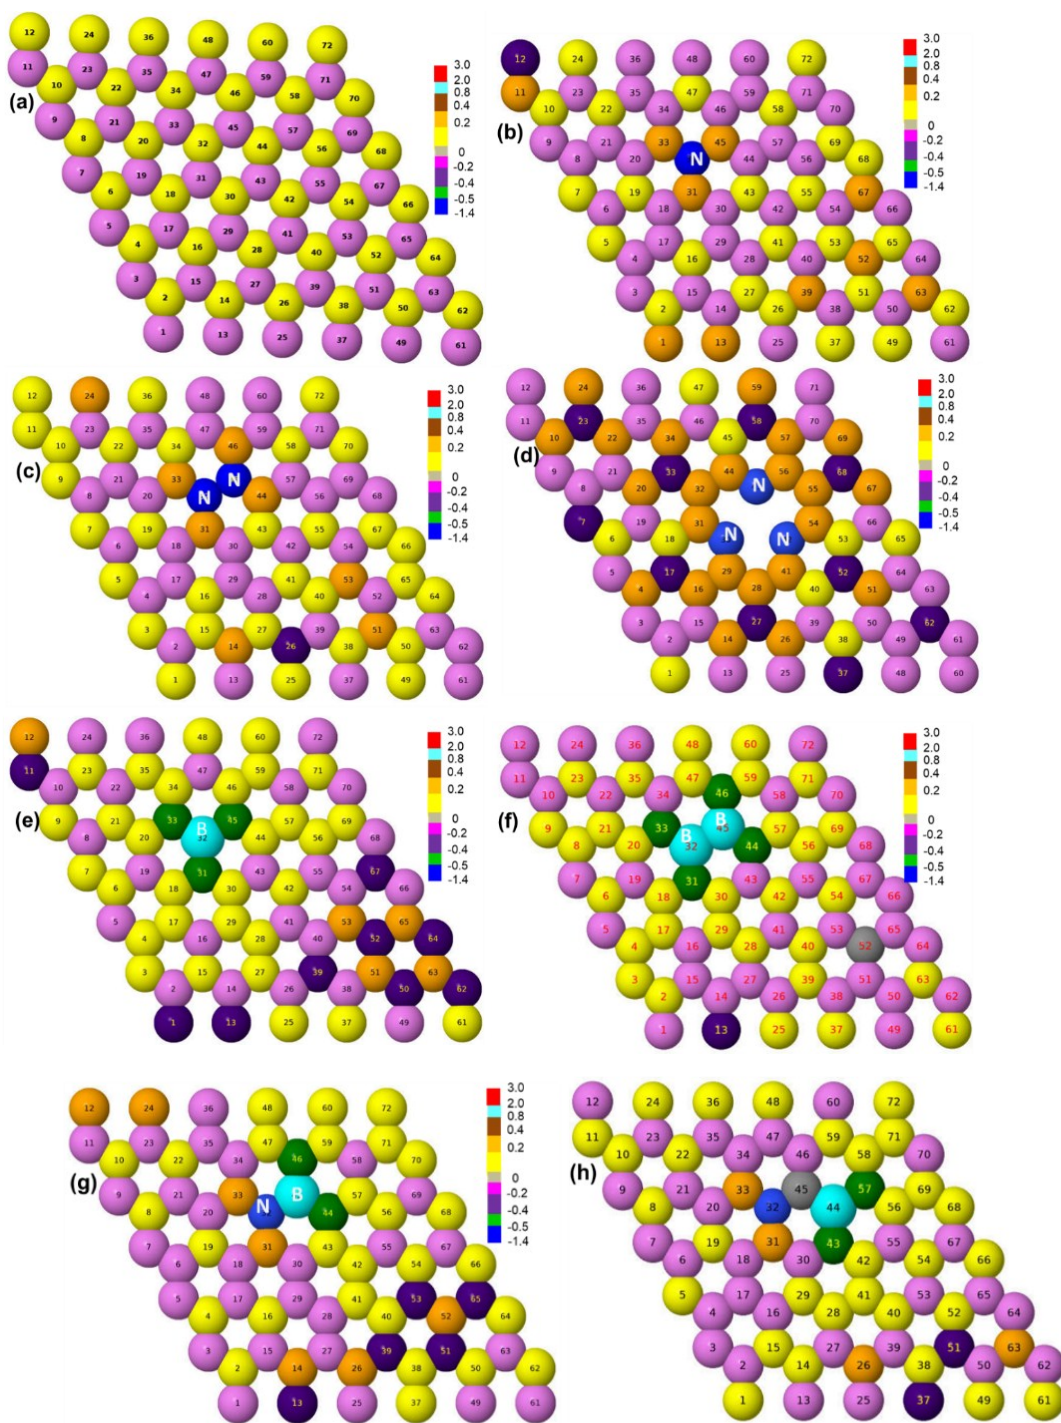

Figure S2: Bader effective charges of pure graphene (a), NG (b), 2NG (c), pyr-3NG (d), BG (e), 2BG (f), b-NBG (g), and s-NBG (h). The colors of the balls stand for relative values of charge density. The charge density decreases linearly from positive to negative values in the color order of red, cyan, pink, orange, yellow, gray, violet, indigo, green, and blue.

Doped atoms are labeled with their corresponding symbols and all the atoms are numbered showing on circles.

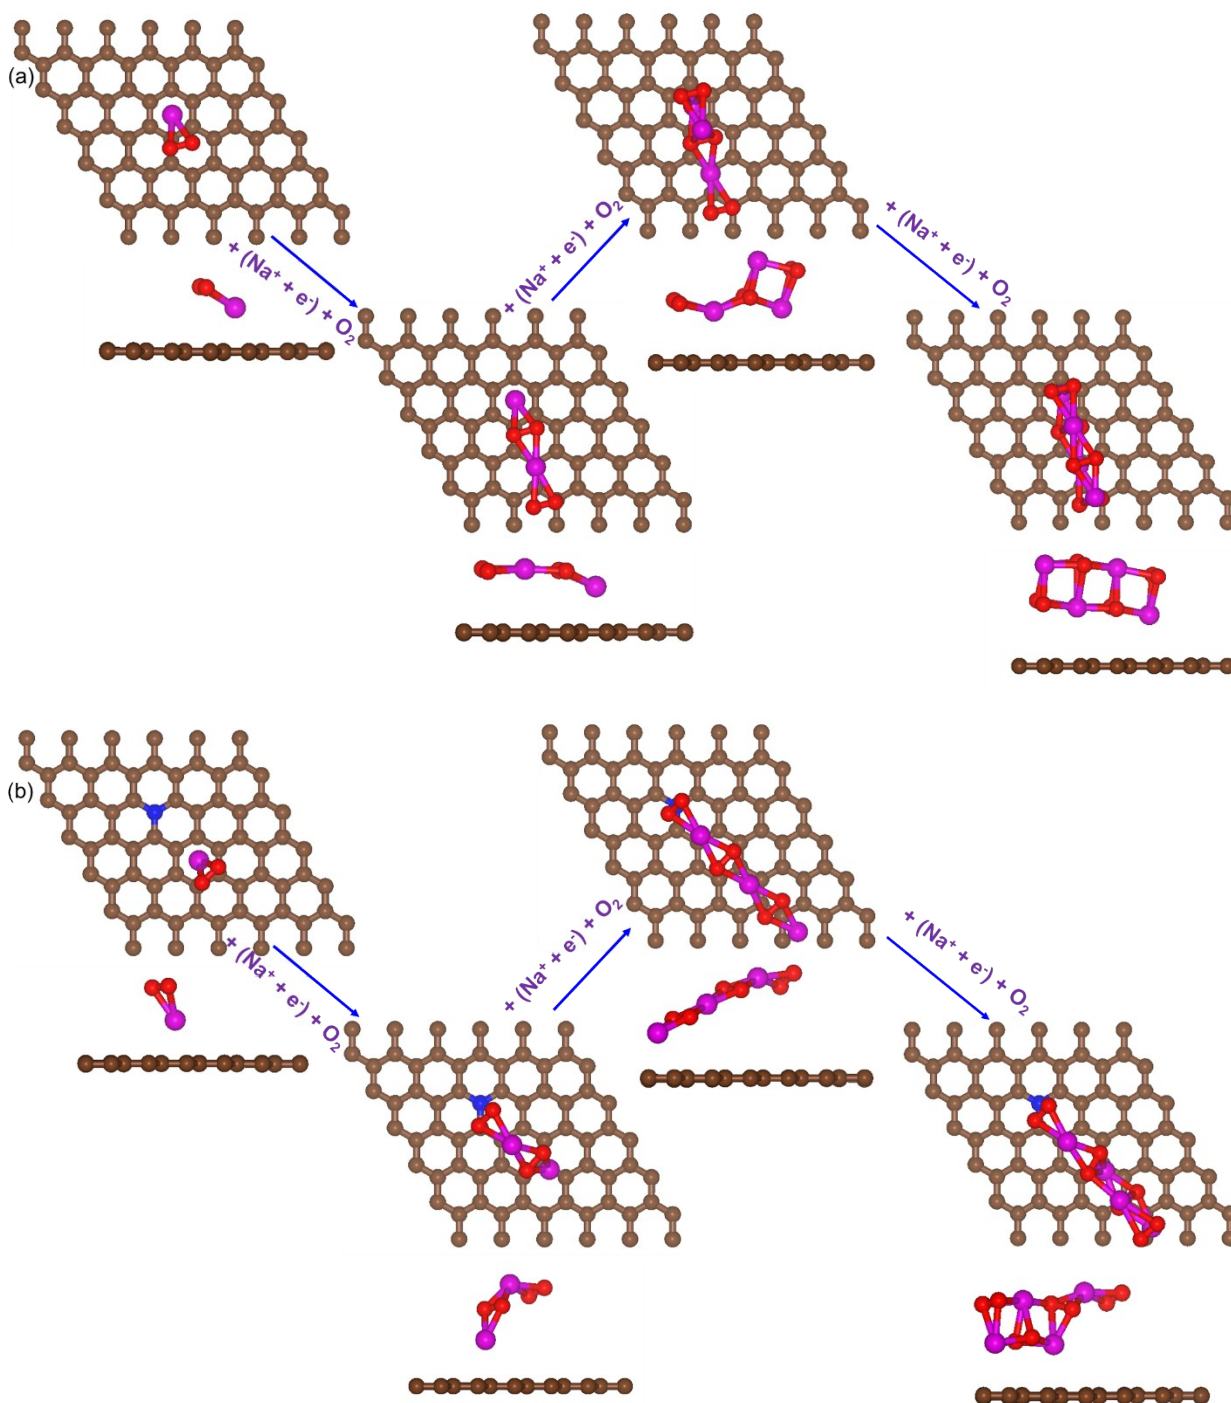

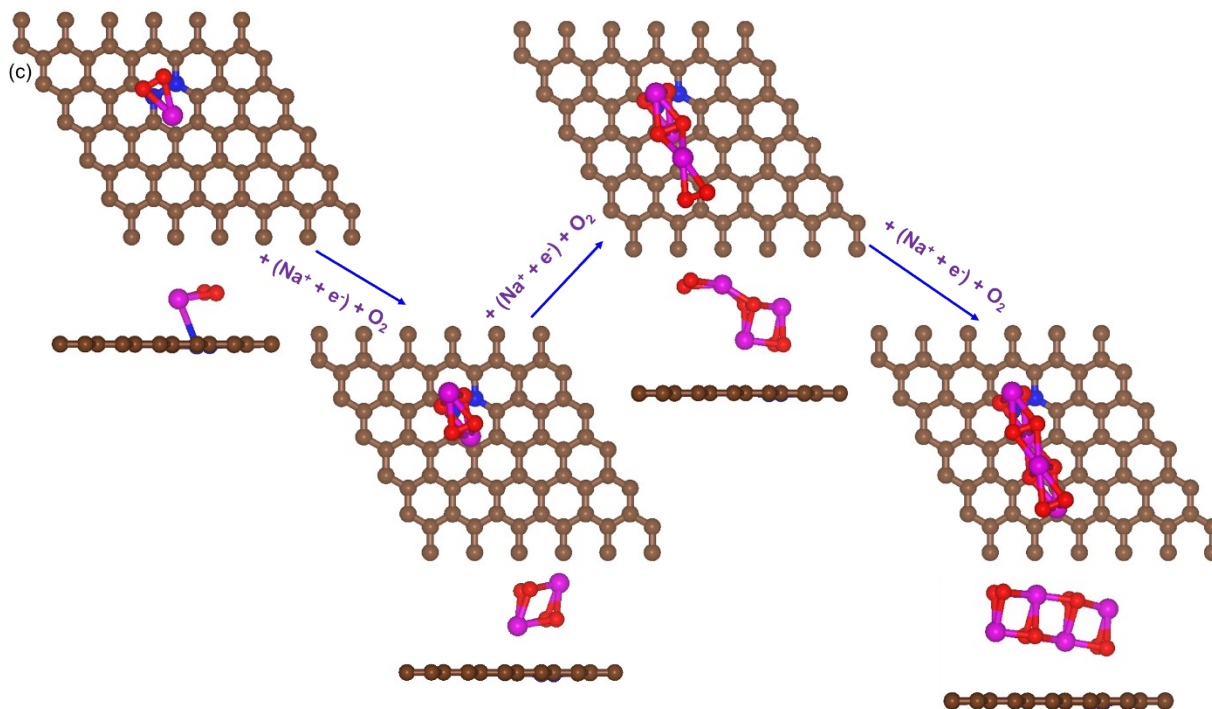

Figure S3: Schematics of the growing pathways of four formula unit of  $\text{NaO}_2$  on pure graphene (a), NG (b) and 2NG (c). The gray and blue spheres indicate C and N atoms, respectively. Deposited atoms labeled as: Na (purple) and O (red).

Table S1: Bader charge analysis for the  $\text{Na}_4\text{O}_8$  formed at the N doped graphene site.

|         | Transferred charge for the adsorbed last intermediate ( $\text{Na}_4\text{O}_8$ ) |               |               |               |              |              |              |              |              |              |              |              | Total        |
|---------|-----------------------------------------------------------------------------------|---------------|---------------|---------------|--------------|--------------|--------------|--------------|--------------|--------------|--------------|--------------|--------------|
|         | $\text{Na}_1$                                                                     | $\text{Na}_2$ | $\text{Na}_3$ | $\text{Na}_4$ | $\text{O}_1$ | $\text{O}_2$ | $\text{O}_3$ | $\text{O}_4$ | $\text{O}_5$ | $\text{O}_6$ | $\text{O}_7$ | $\text{O}_8$ |              |
| Gr      | 0.90                                                                              | 0.89          | 0.89          | 0.90          | -0.49        | -0.50        | -0.42        | -0.43        | -0.38        | -0.36        | -0.47        | -0.44        | <b>0.10</b>  |
| NG      | 0.89                                                                              | 0.89          | 0.90          | 0.90          | -0.53        | -0.53        | -0.41        | -0.41        | -0.36        | -0.35        | -0.50        | -0.50        | <b>0.00</b>  |
| 2NG     | 0.89                                                                              | 0.90          | 0.89          | 0.90          | -0.44        | -0.46        | -0.51        | -0.52        | -0.38        | -0.39        | -0.55        | -0.49        | <b>-0.15</b> |
| pyr-3NG | 0.88                                                                              | 0.90          | 0.90          | 0.90          | -0.37        | -0.36        | -0.39        | -0.41        | -0.27        | -0.26        | -0.52        | -0.50        | <b>0.52</b>  |

Table S2: Bader charge analysis for the  $\text{Na}_4\text{O}_8$  formed at the B doped graphene sites.

|     | Transferred charge for the adsorbed last intermediate ( $\text{Na}_4\text{O}_8$ ) |               |               |               |              |              |              |              |              |              |              |              | <b>Total</b> |
|-----|-----------------------------------------------------------------------------------|---------------|---------------|---------------|--------------|--------------|--------------|--------------|--------------|--------------|--------------|--------------|--------------|
|     | $\text{Na}_1$                                                                     | $\text{Na}_2$ | $\text{Na}_3$ | $\text{Na}_4$ | $\text{O}_1$ | $\text{O}_2$ | $\text{O}_3$ | $\text{O}_4$ | $\text{O}_5$ | $\text{O}_6$ | $\text{O}_7$ | $\text{O}_8$ |              |
| BG  | 0.89                                                                              | 0.89          | 0.90          | 0.91          | -0.39        | -0.38        | -0.39        | -0.39        | -0.36        | -0.37        | -0.43        | -0.43        | <b>0.45</b>  |
| 2BG | 0.88                                                                              | 0.89          | 0.91          | 0.90          | -0.48        | -0.52        | -0.20        | -0.26        | -0.56        | -0.56        | -0.24        | -0.25        | <b>0.50</b>  |

Table S3: Bader charge analysis for the  $\text{Na}_4\text{O}_8$  formed at the N, B-codoped graphene

|       | Transferred charge for the adsorbed last intermediate ( $\text{Na}_4\text{O}_8$ ) |               |               |               |              |              |              |              |              |              |              |              | <b>Tot.</b> |
|-------|-----------------------------------------------------------------------------------|---------------|---------------|---------------|--------------|--------------|--------------|--------------|--------------|--------------|--------------|--------------|-------------|
|       | $\text{Na}_1$                                                                     | $\text{Na}_2$ | $\text{Na}_3$ | $\text{Na}_4$ | $\text{O}_1$ | $\text{O}_2$ | $\text{O}_3$ | $\text{O}_4$ | $\text{O}_5$ | $\text{O}_6$ | $\text{O}_7$ | $\text{O}_8$ |             |
| b-NBG | 0.89                                                                              | 0.89          | 0.9           | 0.91          | -0.55        | -0.44        | -0.40        | -0.42        | -0.41        | -0.42        | -0.40        | -0.27        | <b>0.27</b> |
| s-NBG | 0.89                                                                              | 0.89          | 0.9           | 0.91          | -0.53        | -0.43        | -0.38        | -0.40        | -0.41        | -0.40        | -0.43        | -0.31        | <b>0.28</b> |

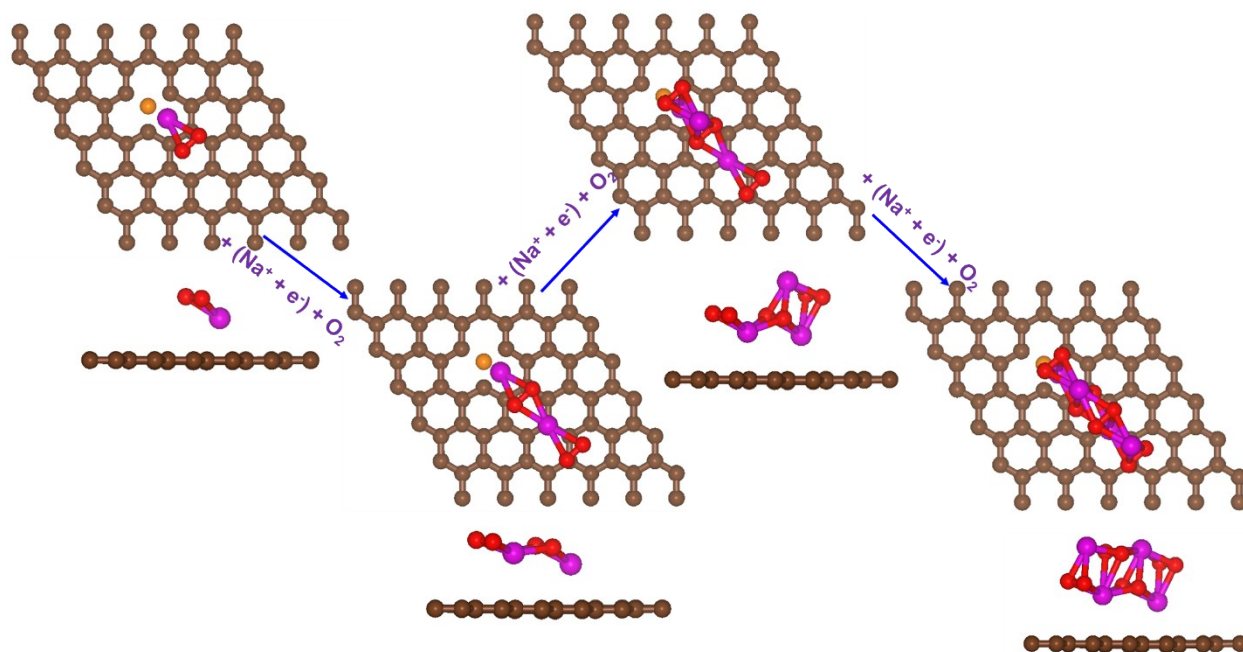

Figure S4: Schematics of the growing pathways of  $4\text{NaO}_2$  on BG. The brown and orange spheres indicate C and B atoms, respectively. Deposited atoms labeled as: Na (purple) and O (red).

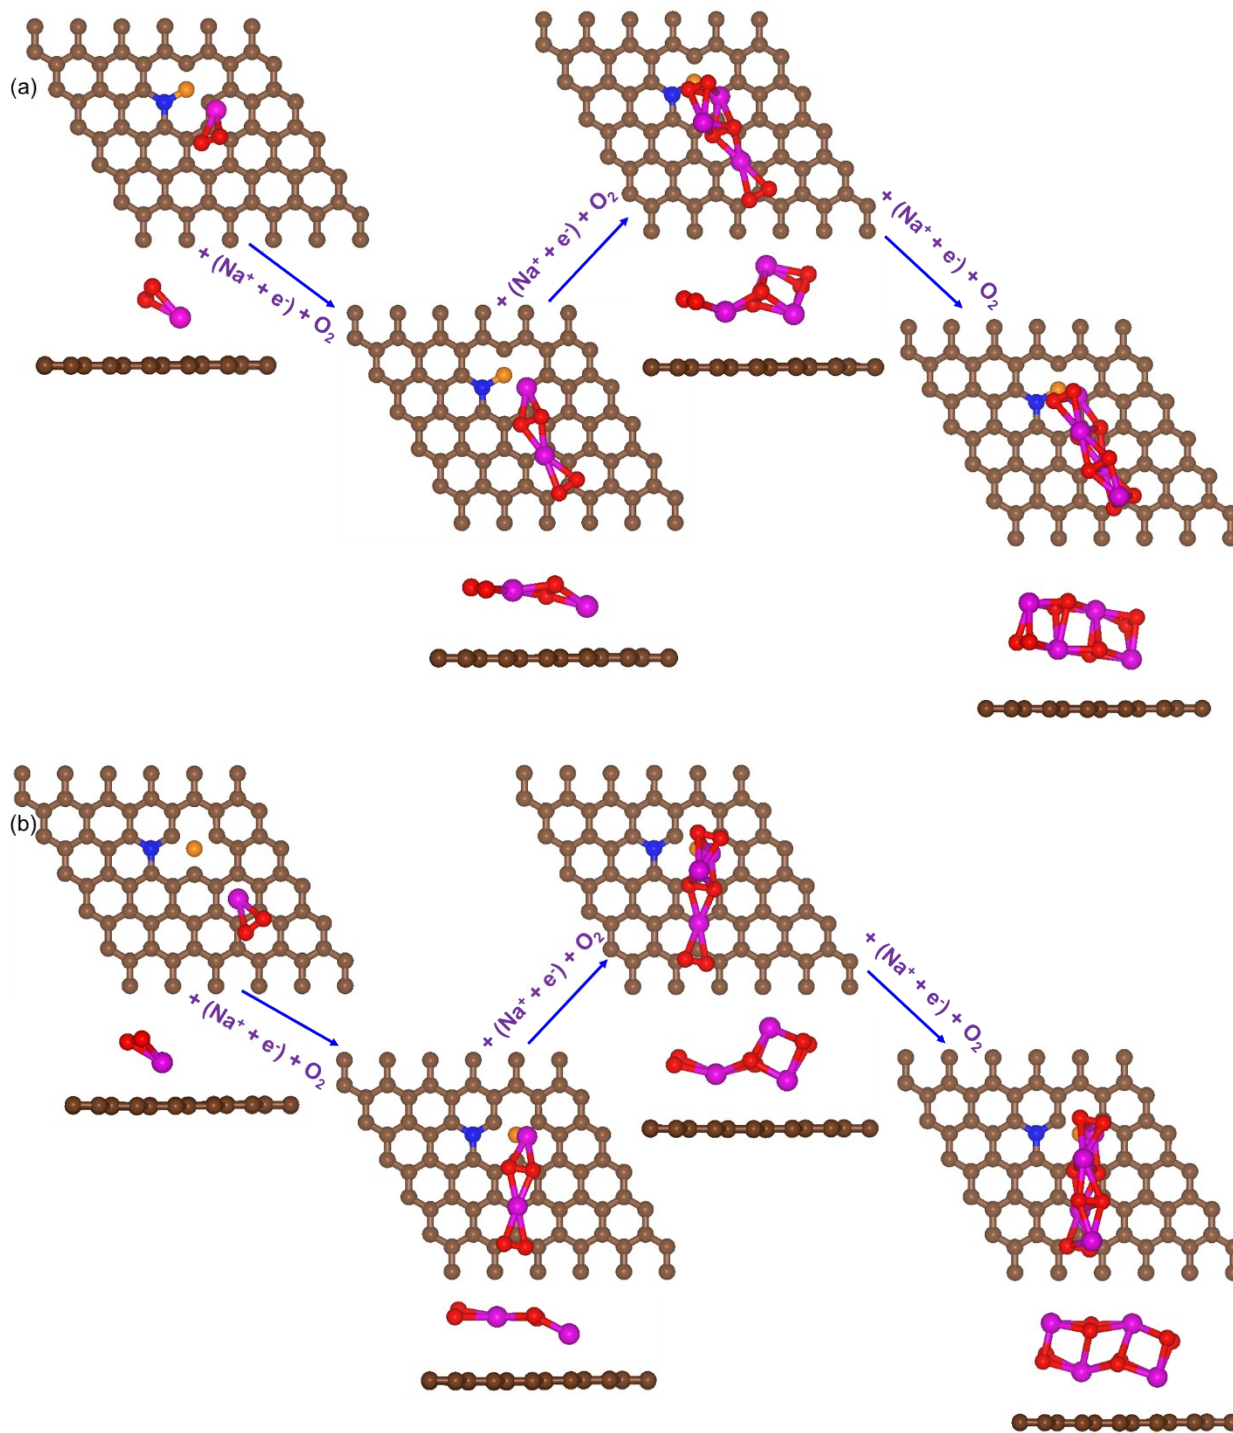

Figure S5: Schematics of the growing pathways of four formula unit of  $\text{NaO}_2$  on b-NBG (a) and s-NBG (b). The brown, blue and orange spheres indicate C, N and B atoms, respectively. Deposited atoms labeled as: Na (purple) and O (red).

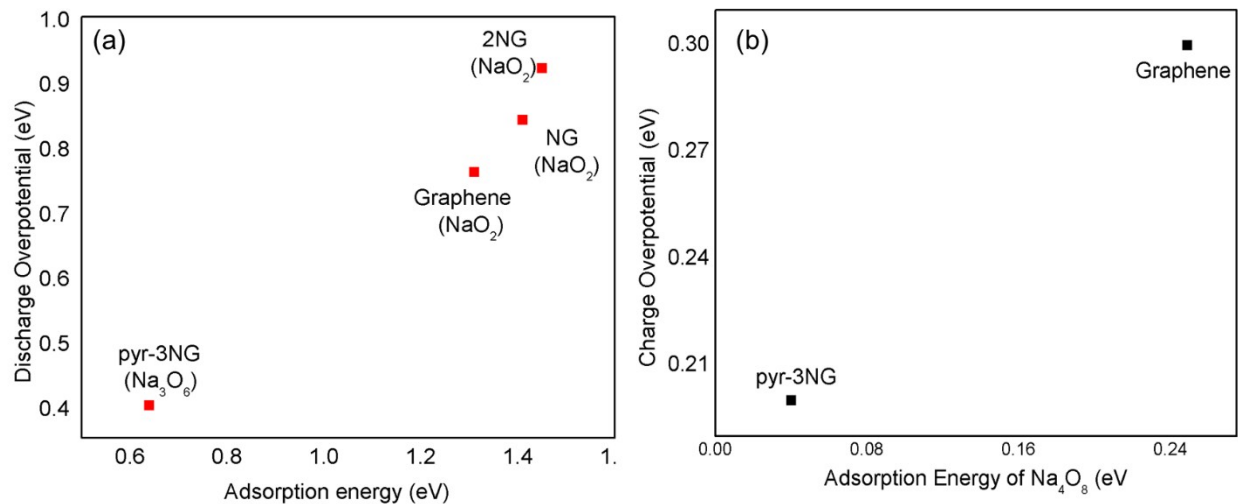

Figure S6: The  $\eta_{\text{dis}}$  as a function of the adsorption energy of NaO<sub>2</sub> (a) and the  $\eta_{\text{ch}}$  as a function of adsorption of Na<sub>4</sub>O<sub>8</sub> (b) for N doped graphene structures

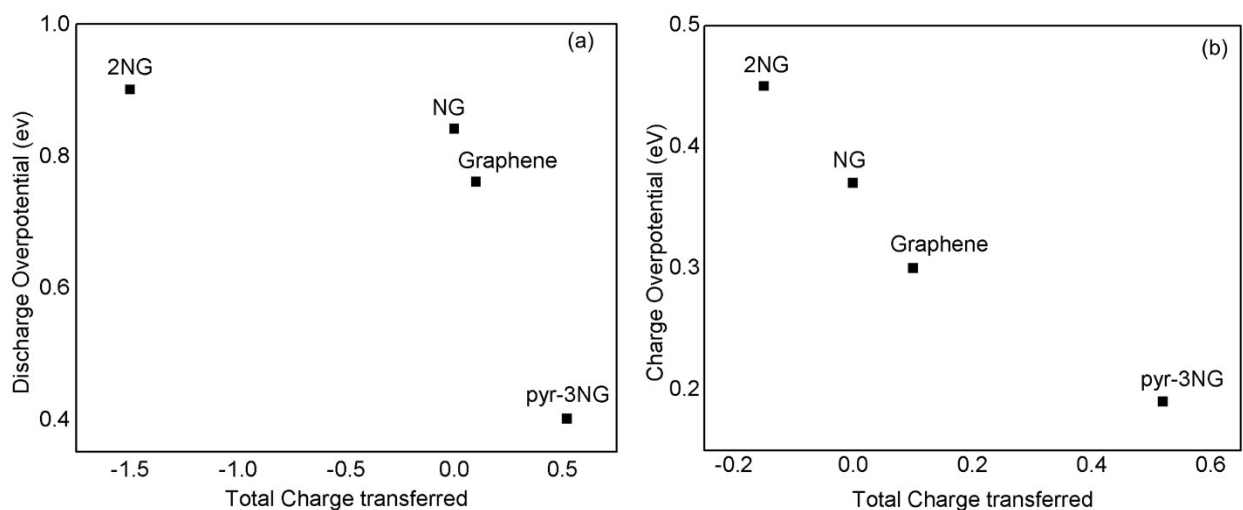

Figure S7: The  $\eta_{\text{dis}}$  as a function of the charge transferred of Na<sub>4</sub>O<sub>8</sub> (a) and the  $\eta_{\text{ch}}$  as a function of charge transferred of Na<sub>4</sub>O<sub>8</sub> (b) for N doped graphene structures

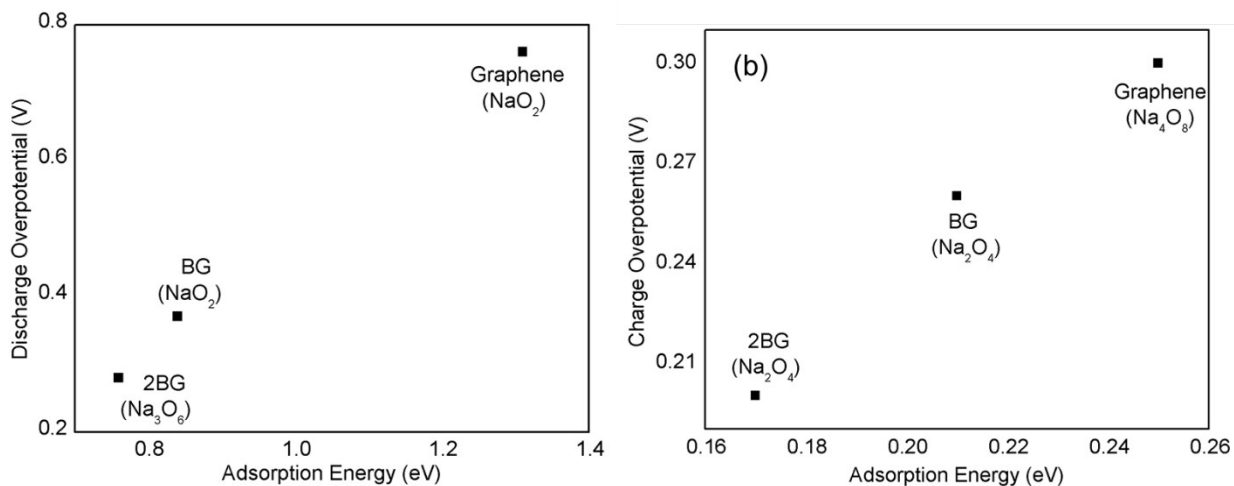

Figure S8: The  $\eta_{\text{dis}}$  as a function of the adsorption energy of NaO<sub>2</sub> (a) and the  $\eta_{\text{ch}}$  as a function of adsorption of Na<sub>4</sub>O<sub>8</sub> (b) for B doped graphene structures

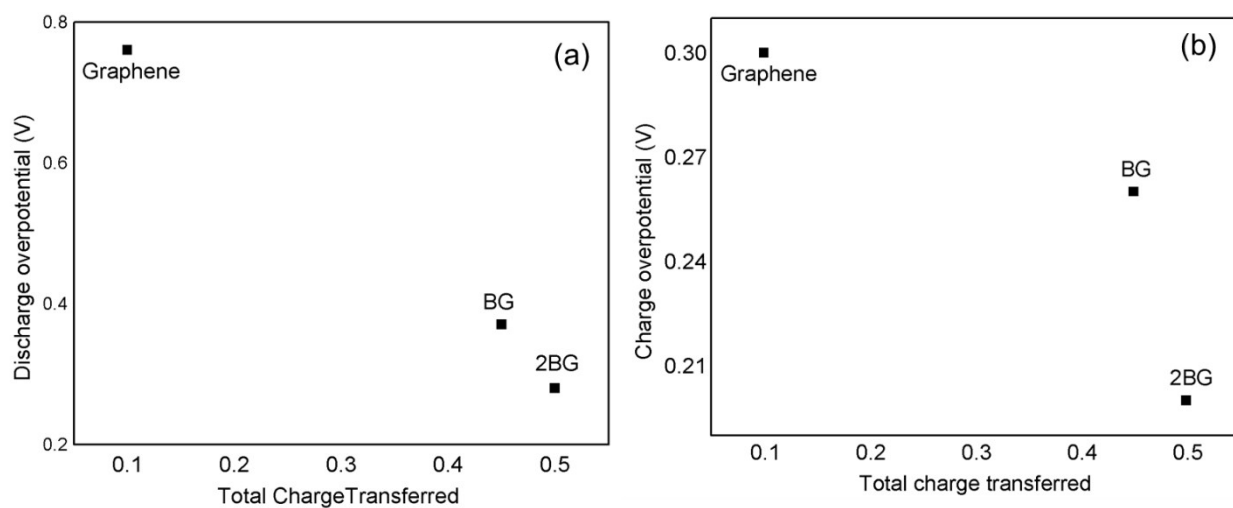

Figure S9: The  $\eta_{\text{dis}}$  as a function of the charge transferred of Na<sub>4</sub>O<sub>8</sub> (a) and the  $\eta_{\text{ch}}$  as a function of charge transferred of Na<sub>4</sub>O<sub>8</sub> (b) for B doped graphene structures

## REFERENCE

- 1 W. Yin and Z. Fu, *ChemCatChem*, 2017, **9**, 1545–1553.
